# Supplementary material
Source: PubMed Central journal article supplement (PMC7682355)
Supplement: pnas.2009238117.sapp.pdf [file pnas.2009238117.sapp.pdf]

# PNAS

[www.pnas.org](http://www.pnas.org)

Supplementary Information for

## **Evidence for aggregation-independent, PrP<sup>C</sup>-mediated A $\beta$ cellular internalization**

Alejandro R. Foley,<sup>[a],†</sup> Graham P. Roseman,<sup>[a],†</sup> Ka Chan,<sup>[a]</sup> Amanda Smart,<sup>[a]</sup> Thomas S. Finn,<sup>[a]</sup>, Kevin Yang,<sup>[a]</sup> R. Scott Lokey,<sup>[a]</sup> Glenn L. Millhauser,<sup>[a]</sup>, \* Jevgenij A. Raskatov.<sup>[a],\*</sup>

† Denotes equal contribution, alphabetically ordered

**Corresponding authors:** Glenn L. Millhauser, Jevgenij A. Raskatov.

**Email:** glennm@ucsc.edu, jraskato@ucsc.edu.

### **This PDF file includes:**

Supplementary text  
Figures S1 to S10  
Tables S1 to S2

### L-A $\beta$ 40-TAMRA

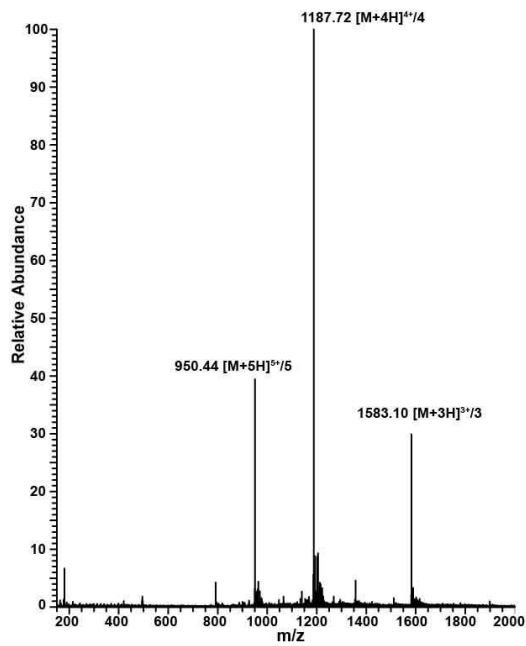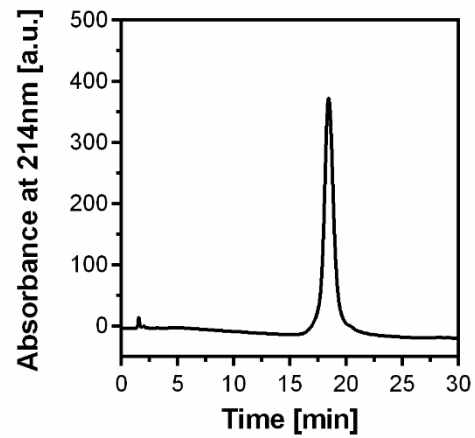

| Peak # | Time [min] | Area  | % Area |
|--------|------------|-------|--------|
| 1      | 18.45      | 24260 | 98.2   |
| 2      | 20.15      | 444   | 1.8    |

### D-A $\beta$ 40-TAMRA

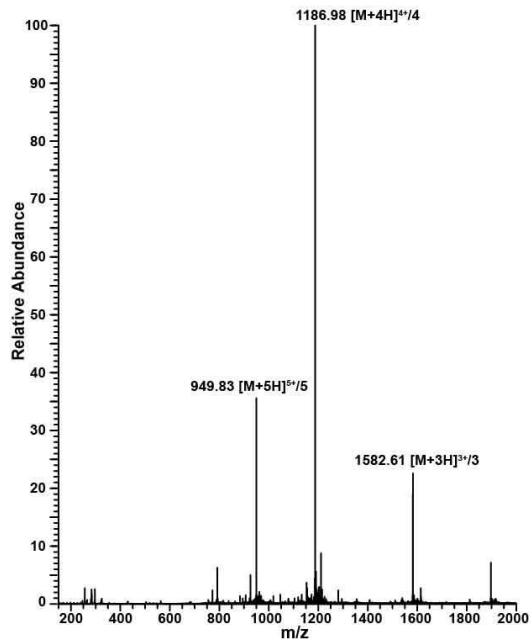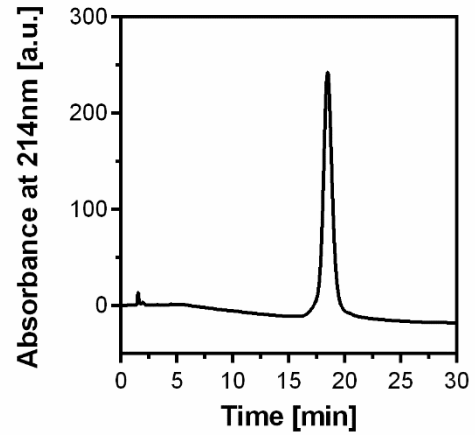

| Peak # | Time [min] | Area  | % Area |
|--------|------------|-------|--------|
| 1      | 18.47      | 15012 | 99.2   |
| 2      | 20.17      | 125   | 0.8    |

**Fig. S1.** Mass spectrometry and HPLC characterization for L- and D- A $\beta$ 40 TAMRA-labeled samples.

**L- $\text{A}\beta(1-16)$ -TAMRA**

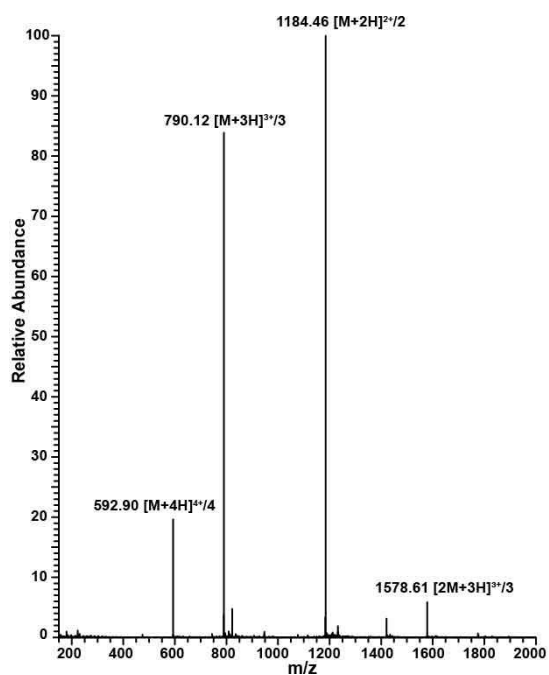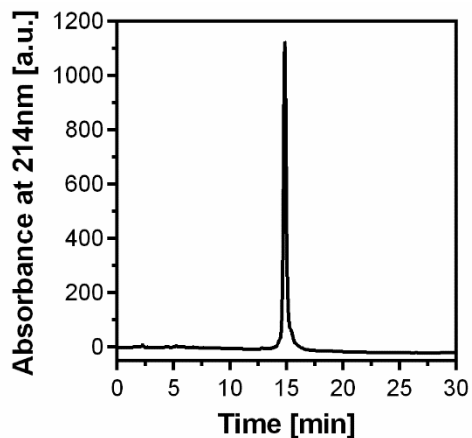

| Peak # | Time [min] | Area  | % Area |
|--------|------------|-------|--------|
| 1      | 14.2       | 266   | 1.3    |
| 2      | 14.6       | 18919 | 95.3   |
| 3      | 15.1       | 665   | 3.4    |

**D- $\text{A}\beta(1-16)$ -TAMRA**

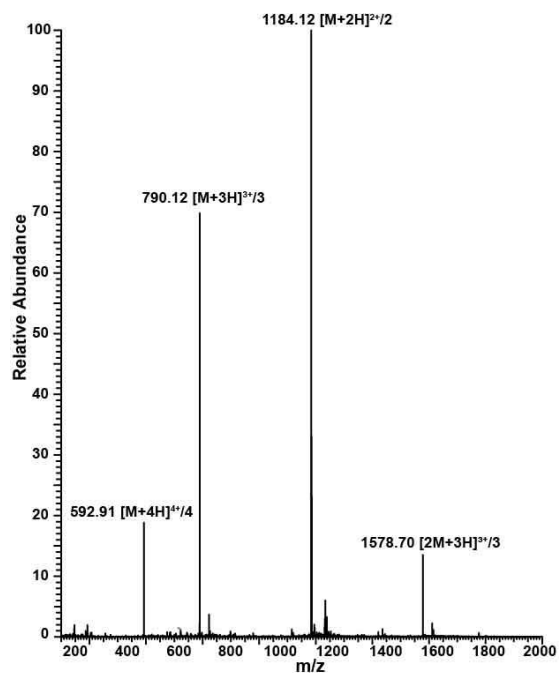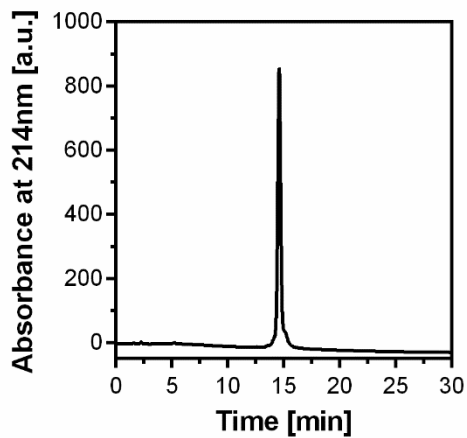

| Peak # | Time [min] | Area  | % Area |
|--------|------------|-------|--------|
| 1      | 14.2       | 190   | 1.1    |
| 2      | 14.6       | 16439 | 95.1   |
| 3      | 15         | 649   | 3.8    |

**Fig. S2.** Mass spectrometry and HPLC characterization for L- and D-  $\text{A}\beta(1-16)$  TAMRA-labeled samples.

### L-A $\beta$ (1-30)

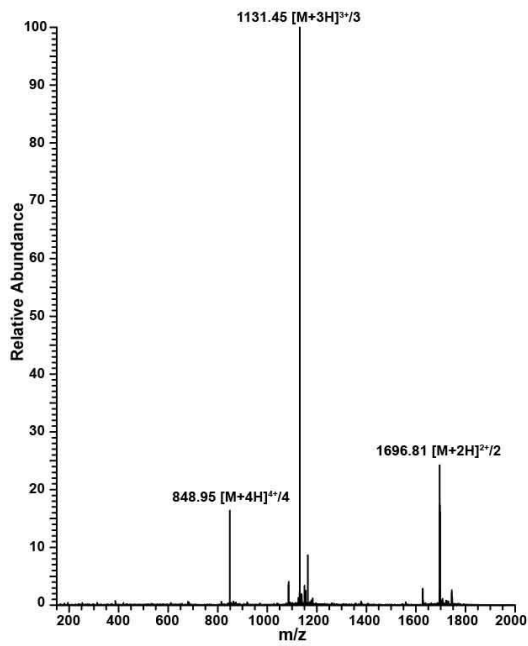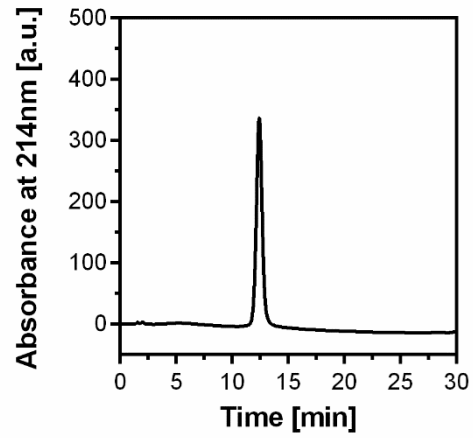

| Peak # | Time [min] | Area  | % Area |
|--------|------------|-------|--------|
| 1      | 12.4       | 12380 | 99.3   |
| 2      | 13.2       | 93    | 0.7    |

### L-A $\beta$ (1-30)-TAMRA

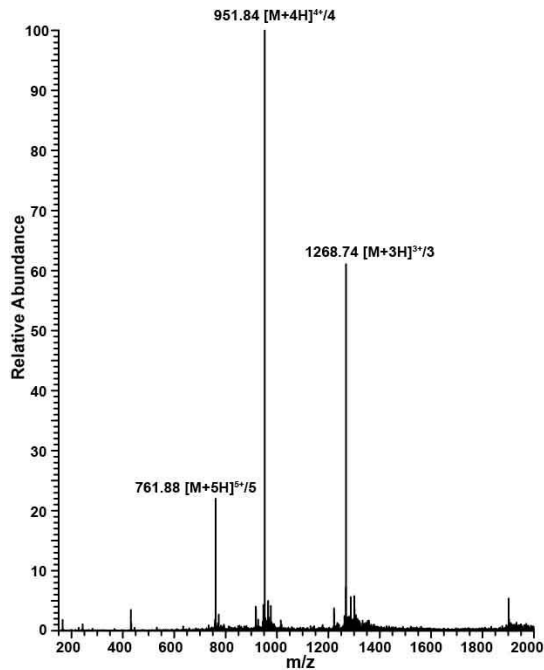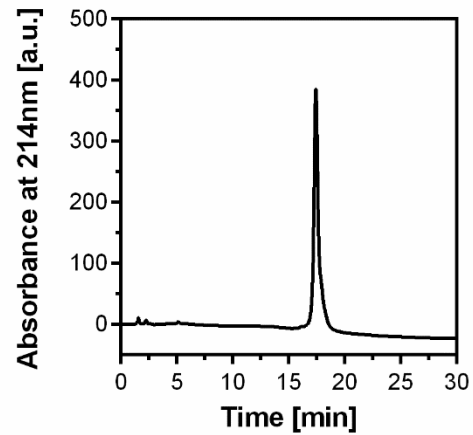

| Peak # | Time [min] | Area  | % Area |
|--------|------------|-------|--------|
| 1      | 16.6       | 111   | 0.9    |
| 2      | 17.4       | 12011 | 99.1   |

**Figure S3.** Mass spectrometry and HPLC characterization for L-A $\beta$ (1-30) and L-A $\beta$ (1-30)-TAMRA samples.

### D-A $\beta$ (1-30)

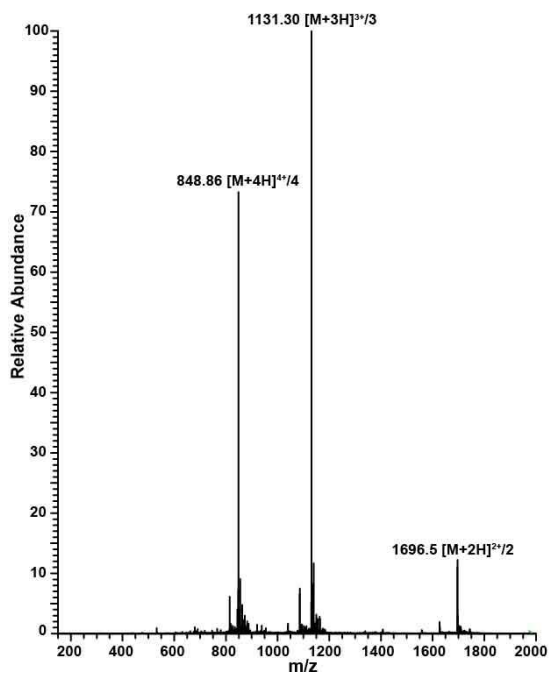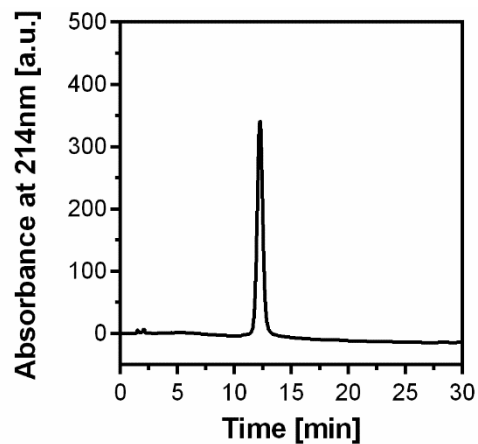

| Peak # | Time [min] | Area  | % Area |
|--------|------------|-------|--------|
| 1      | 12.3       | 11907 | 99.5   |
| 2      | 13         | 55    | 0.5    |

### D-A $\beta$ (1-30)-TAMRA

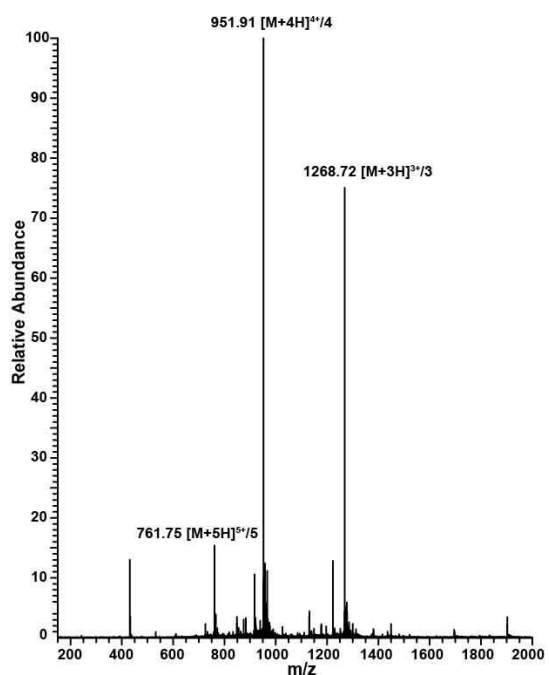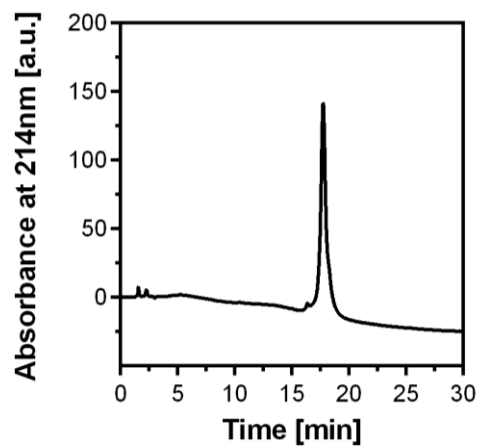

| Peak # | Time [min] | Area | % Area |
|--------|------------|------|--------|
| 1      | 16.8       | 125  | 2.2    |
| 2      | 17.7       | 5531 | 97.8   |

**Figure S4.** Mass spectrometry and HPLC characterization for D-A $\beta$ (1-30) and D-A $\beta$ (1-30)-TAMRA samples.

**L-A $\beta$ (16-30)-TAMRA**

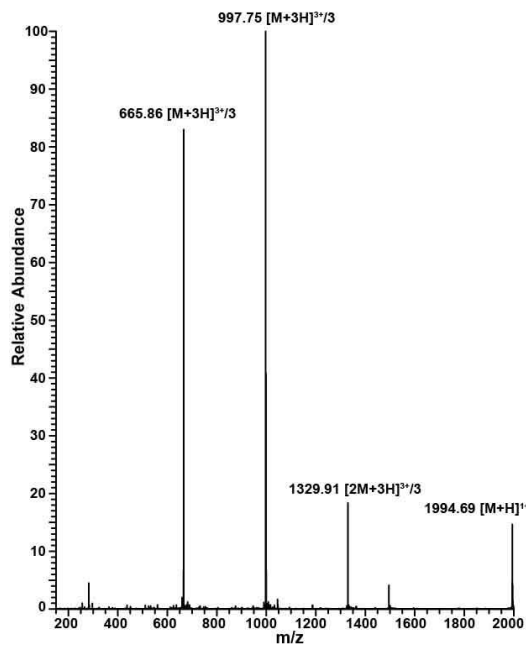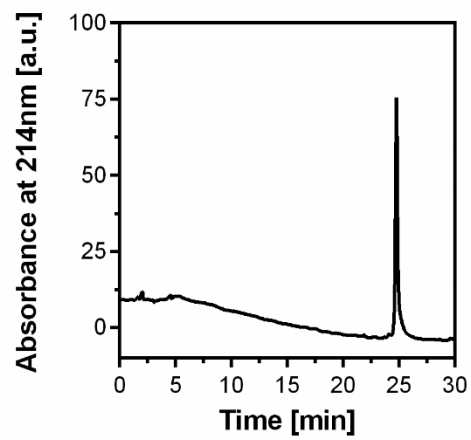

| Peak # | Time [min] | Area | % Area |
|--------|------------|------|--------|
| 1      | 24.8       | 1206 | 97.6   |
| 2      | 25.5       | 30   | 2.4    |

**D-A $\beta$ (16-30)-TAMRA**

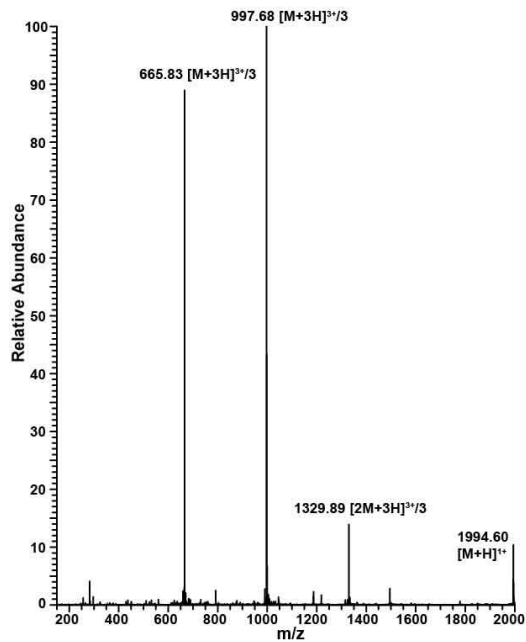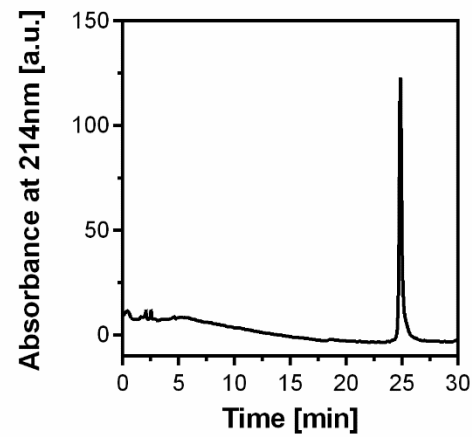

| Peak # | Time [min] | Area | % Area |
|--------|------------|------|--------|
| 1      | 24.9       | 2216 | 98     |
| 2      | 25.6       | 46   | 2      |

**Figure S5.** Mass spectrometry and HPLC characterization for L- and D- A $\beta$ (16-30) TAMRA-labeled samples.

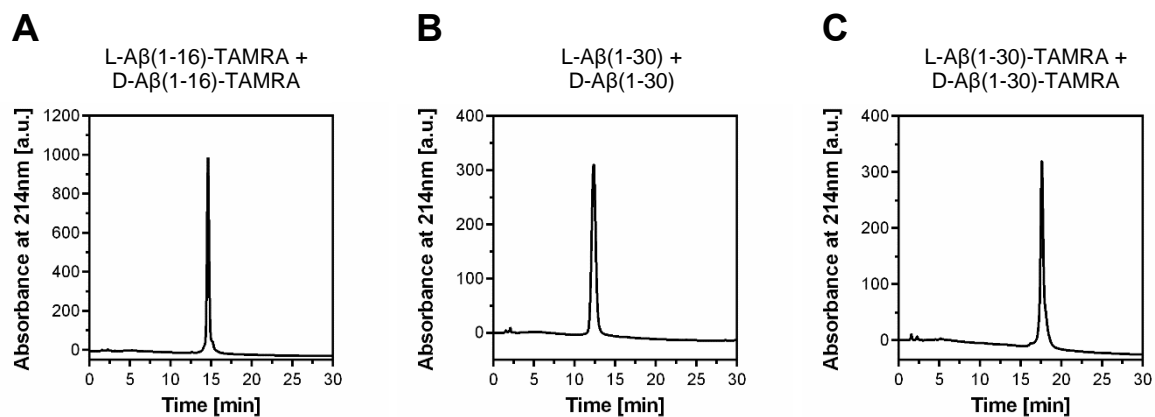

**Figure S6.** HPLC co-injection of enantiomeric pairs (1:1). Chromatograms of L+D mixtures of the peptides result in a single peak, confirming the expected retention similarity. (A) L-A $\beta$ (1-16)-TAMRA + D-A $\beta$ (1-16)-TAMRA. (B) L-A $\beta$ (1-30) + D-A $\beta$ (1-30). (C) L-A $\beta$ (1-30)-TAMRA + D-A $\beta$ (1-30)-TAMRA.

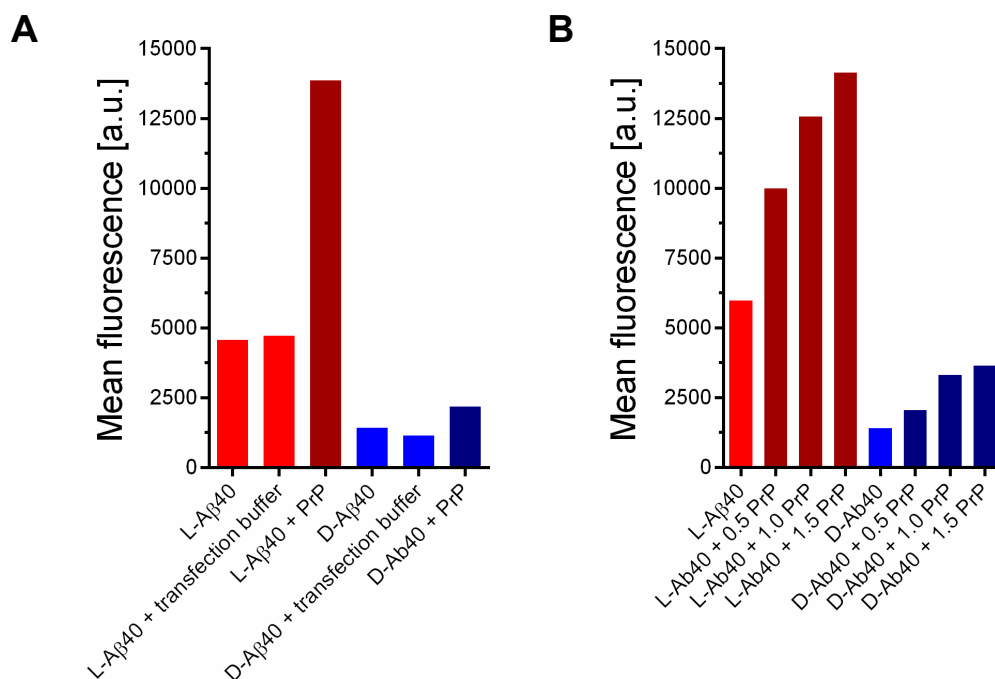

**Figure S7.** (A) Transfection buffer control for A $\beta$ 40 uptake in HEK293T cells (2h incubation time). (B) PrP<sup>C</sup> transfection titration dependence of A $\beta$  uptake in HEK293T cells (2h incubation time).

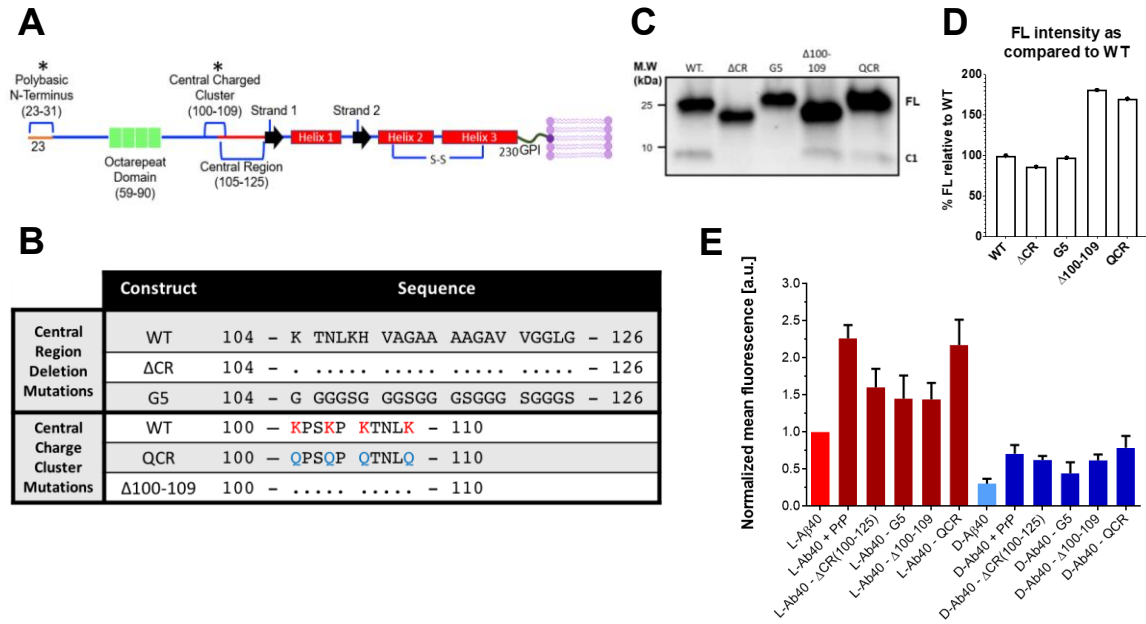

**Figure S8.** Mutations in PrP<sup>C</sup> sequence and NMR binding site. (A) Scheme of PrP<sup>C</sup> structure, with \* indicating previously reported possible PrP<sup>C</sup>-A $\beta$  binding sites. (B) Mutations performed in transfected PrP<sup>C</sup>. (C) Western blot showing expression of transfected PrP<sup>C</sup> constructs. (D) Western blot intensity comparison (E) Mean flow cytometry quantitation of A $\beta$  uptake for PrP<sup>C</sup> and PrP<sup>C</sup> constructs with error bars showing SD from 3 biological replicates.



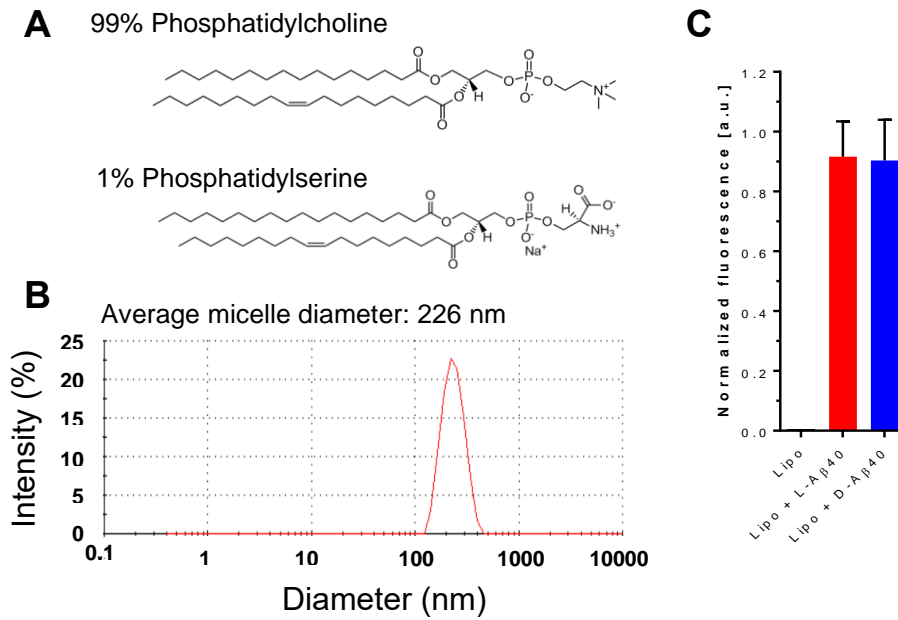

**Figure S9.** Liposome association of L-A $\beta$ 40 and D-A $\beta$ 40 in 99:1 PC:PS phospholipid micelles. (A) Phospholipid structures. (B) Dynamic Light Scattering (DLS) showing diameter distribution of the lipid micelles synthesized. (C) Lipid encapsulation quantitation by flow cytometry, showing average normalized value with error bars for SD of 2 technical replicates. Lipo: Liposomes control with no A $\beta$ 40 dosing.

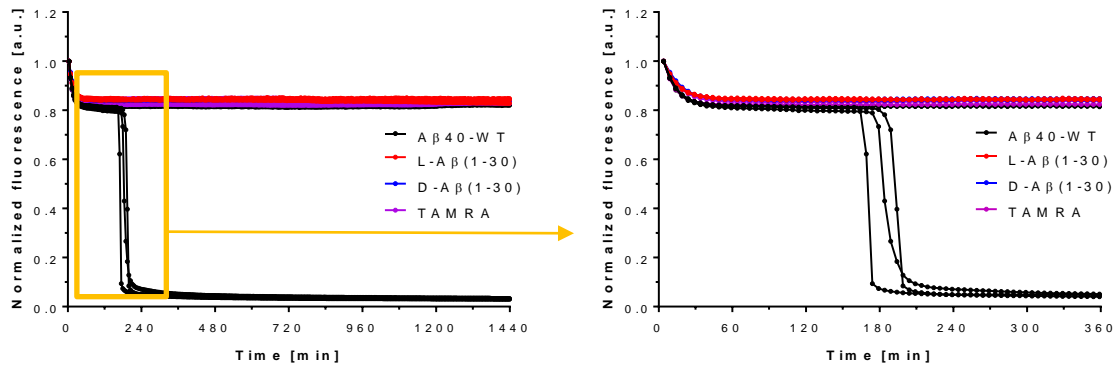

**Figure S10.** Aggregation kinetics monitored by TAMRA fluorescence for TAMRA alone and TAMRA-conjugated peptides at 5  $\mu\text{M}$  concentration for all samples. Aggregation and fibril formation results in decay of fluorescence signal. Samples were run for at 37  $^{\circ}\text{C}$  in in 20mM phosphate buffer pH 7.4 with continuous shaking. Data show individual curves for 3 technical replicates. Note that L-A $\beta$ (1-30), D-A $\beta$ (1-30), and TAMRA curves overlap.

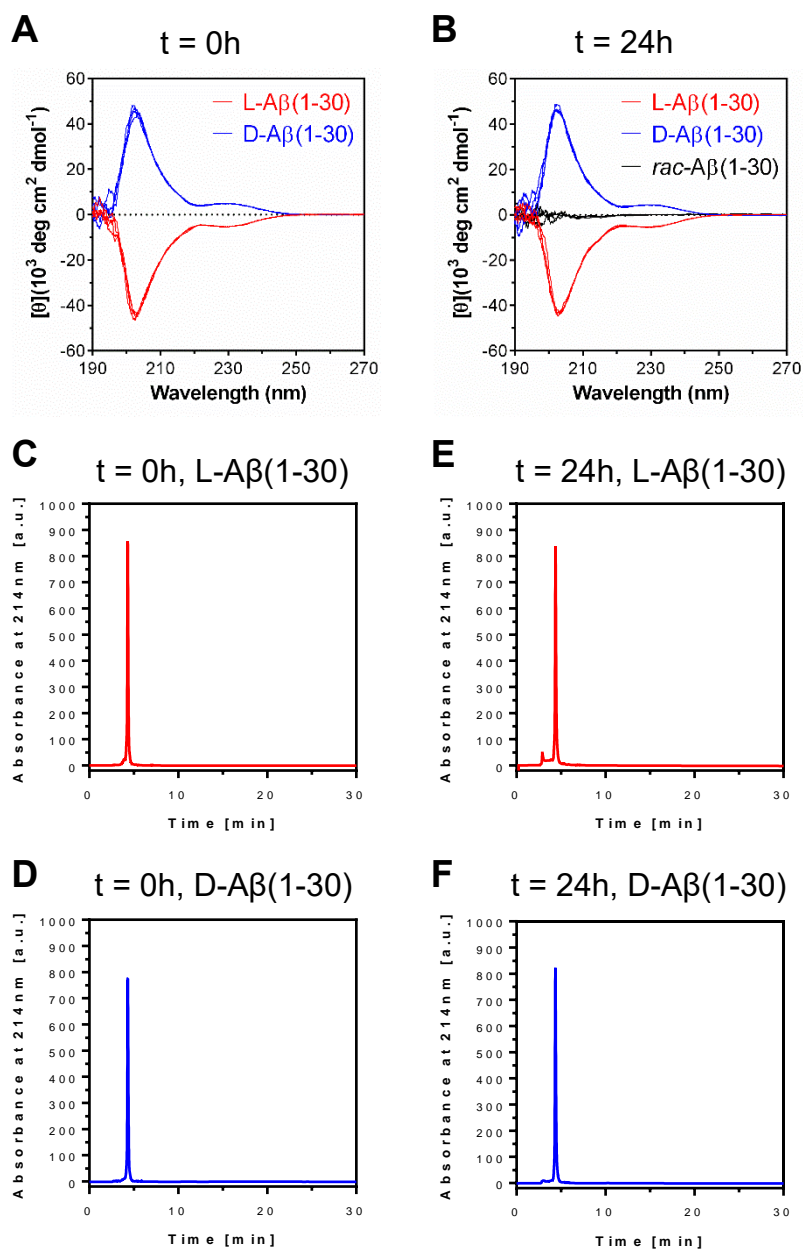

**Figure S11.** Aggregation state of L- and D- Aβ(1-30) peptides at 200 μM concentration (same concentration as NMR experiments). (A-B) CD spectroscopy curves for L-Aβ(1-30) and D-Aβ(1-30) at t=0 and after 24h incubation at 37 °C in 20mM phosphate buffer pH 7.4. Curves show random coil conformation in both cases. At the end of the 24h experiment, equal volumes of L- and D- Aβ(1-30) were mixed (rac-Aβ(1-30)) to obtain a flat line which confirms that similar species are present for the enantiomers. Four replicates are shown in each case. (C,E) Size exclusion chromatography for L-Aβ(1-30) at t=0 and after 24h incubation at 37 °C in 20mM phosphate buffer pH 7.4. (D,F) Size exclusion chromatography for L-Aβ(1-30) at t=0 and after 24h incubation at 37 °C in 20mM phosphate buffer pH 7.4.

**Table S1.** NMR data extracted from WT PrP<sup>C</sup> sample and WT PrP<sup>C</sup> and L-A $\beta$ (1-30). Data includes the  $\omega_N$  (ppm),  $\omega_{HN}$  (ppm), and peak height for each assigned residue from each spectrum collected. Intensity ratio's (I/I<sub>0</sub>) and weighted average chemical shifts ( $\Delta$ ) were calculated as described in the material and methods.

| Assignment | 100 $\mu$ M WT PrP <sup>C</sup> |                     |                               | 100 $\mu$ M WT PrP <sup>C</sup> and 200 $\mu$ M L-A $\beta$ (1-30) |                     |                               | Results                             |                             |
|------------|---------------------------------|---------------------|-------------------------------|--------------------------------------------------------------------|---------------------|-------------------------------|-------------------------------------|-----------------------------|
|            | $\omega_N$ (ppm)                | $\omega_{HN}$ (ppm) | Peak Height (I <sub>0</sub> ) | $\omega_N$ (ppm)                                                   | $\omega_{HN}$ (ppm) | Peak Height (I <sub>0</sub> ) | Intensity Ratio (I/I <sub>0</sub> ) | Chemical Shift ( $\Delta$ ) |
| T94N-H     | 113.351                         | 7.985               | 6424100                       | 113.36                                                             | 7.983               | 3019894                       | 0.470088261                         | 0.004215448                 |
| K100N-H    | 122.402                         | 7.953               | 17950030                      | 122.371                                                            | 7.947               | 12638700                      | 0.704104673                         | 0.014119844                 |
| S102N-H    | 116.719                         | 8.385               | 3242517                       | 116.675                                                            | 8.381               | 1120979                       | 0.345712605                         | 0.018577406                 |
| K103N-H    | 124.05                          | 8.281               | 5787884                       | 124.023                                                            | 8.277               | 2398607                       | 0.414418637                         | 0.011829201                 |
| K105N-H    | 122.001                         | 8.508               | 8902112                       | 121.998                                                            | 8.507               | 4289224                       | 0.481820943                         | 0.001590597                 |
| L108N-H    | 123.108                         | 8.26                | 24243946                      | 123.091                                                            | 8.258               | 14864928                      | 0.613139792                         | 0.007289033                 |
| K109N-H    | 121.679                         | 8.252               | 13555170                      | 121.668                                                            | 8.252               | 8684310                       | 0.640664042                         | 0.004535416                 |
| A112N-H    | 127.989                         | 8.395               | 21615208                      | 127.958                                                            | 8.391               | 16654246                      | 0.770487427                         | 0.013392909                 |
| A114N-H    | 123.844                         | 8.113               | 17861734                      | 123.828                                                            | 8.111               | 9870933                       | 0.552630165                         | 0.006893475                 |
| A115N-H    | 123.201                         | 8.199               | 30383374                      | 123.183                                                            | 8.194               | 24863478                      | 0.818325114                         | 0.008948743                 |
| A116N-H    | 123.343                         | 8.112               | 7835814                       | 123.375                                                            | 8.114               | 7278524                       | 0.928879118                         | 0.013344662                 |
| A117N-H    | 123.237                         | 8.169               | 46948304                      | 123.218                                                            | 8.168               | 31380182                      | 0.668398628                         | 0.007897468                 |
| G118N-H    | 107.882                         | 8.252               | 16956138                      | 107.879                                                            | 8.252               | 10436704                      | 0.615511858                         | 0.001236932                 |
| A119N-H    | 123.542                         | 8.047               | 23887984                      | 123.532                                                            | 8.045               | 17431636                      | 0.729724032                         | 0.004582576                 |
| V120N-H    | 119.52                          | 8.102               | 35979440                      | 119.495                                                            | 8.098               | 32017722                      | 0.889889392                         | 0.011056672                 |
| V121N-H    | 124.536                         | 8.243               | 29050736                      | 124.519                                                            | 8.242               | 23827096                      | 0.820189065                         | 0.007080254                 |
| G122N-H    | 113.262                         | 8.531               | 11129416                      | 113.243                                                            | 8.528               | 6709092                       | 0.602825162                         | 0.008388683                 |
| L124N-H    | 121.71                          | 8.173               | 12121994                      | 121.708                                                            | 8.174               | 8971438                       | 0.740095895                         | 0.001296148                 |
| Y127N-H    | 117.99                          | 7.817               | 9912163                       | 117.996                                                            | 7.821               | 9488505                       | 0.957258774                         | 0.00470319                  |
| M128N-H    | 121.441                         | 9.092               | 3213702                       | 121.448                                                            | 9.092               | 3014108                       | 0.93789281                          | 0.002886174                 |
| G130N-H    | 114.948                         | 9.37                | 1208061                       | 114.957                                                            | 9.368               | 991080                        | 0.820389037                         | 0.004215448                 |
| S131N-H    | 113.79                          | 8.274               | 10024192                      | 113.795                                                            | 8.275               | 9122639                       | 0.910062277                         | 0.002291288                 |
| A132N-H    | 125.553                         | 8.686               | 8212766                       | 125.557                                                            | 8.686               | 7566877                       | 0.921355485                         | 0.001649242                 |
| M133N-H    | 121.298                         | 8.746               | 5057316                       | 121.289                                                            | 8.746               | 4475074                       | 0.884871343                         | 0.003710795                 |
| S134N-H    | 116.193                         | 8.395               | 5751096                       | 116.194                                                            | 8.395               | 4465210                       | 0.77641027                          | 0.000412311                 |
| R135N-H    | 126.605                         | 8.62                | 6128346                       | 126.601                                                            | 8.62                | 5427170                       | 0.885584789                         | 0.001649242                 |
| M137N-H    | 122.008                         | 8.666               | 5063768                       | 121.966                                                            | 8.66                | 3997578                       | 0.789447305                         | 0.018327029                 |
| I138N-H    | 124.305                         | 6.569               | 8414730                       | 124.298                                                            | 6.57                | 8066947                       | 0.958669737                         | 0.003054505                 |
| F140N-H    | 125.147                         | 10.318              | 4311424                       | 125.172                                                            | 10.325              | 3745983                       | 0.868850524                         | 0.012459936                 |
| G141N-H    | 108.992                         | 8.9                 | 4153183                       | 109.037                                                            | 8.883               | 3191345                       | 0.768409434                         | 0.025164459                 |
| N142N-H    | 114.356                         | 7.236               | 13369215                      | 114.375                                                            | 7.232               | 12114600                      | 0.90615642                          | 0.008796022                 |
| D143N-H    | 123.239                         | 8.977               | 2663396                       | 123.287                                                            | 8.974               | 1463707                       | 0.549564165                         | 0.020016993                 |
| W144N-H    | 120.319                         | 8.493               | 9552731                       | 120.261                                                            | 8.493               | 9427032                       | 0.986841564                         | 0.023914013                 |
| Y148N-H    | 120.858                         | 8.243               | 8402322                       | 120.832                                                            | 8.239               | 7660228                       | 0.91167989                          | 0.011442028                 |
| Y149N-H    | 120.489                         | 8.986               | 5913274                       | 120.498                                                            | 8.989               | 5371904                       | 0.908448349                         | 0.004771792                 |
| R150N-H    | 117.337                         | 7.867               | 7133547                       | 117.308                                                            | 7.865               | 6750680                       | 0.946328664                         | 0.012123118                 |
| E151N-H    | 115.802                         | 7.886               | 7709018                       | 115.817                                                            | 7.886               | 7245764                       | 0.939907521                         | 0.006184658                 |
| N152N-H    | 115.175                         | 7.529               | 5747722                       | 115.164                                                            | 7.528               | 5821518                       | 1.012839174                         | 0.004644351                 |
| M153N-H    | 118.393                         | 7.845               | 6417437                       | 118.388                                                            | 7.846               | 5927880                       | 0.923714561                         | 0.002291288                 |
| Y154N-H    | 116.584                         | 7.552               | 6384978                       | 116.571                                                            | 7.55                | 6338655                       | 0.992745002                         | 0.005721014                 |
| R155N-H    | 118.875                         | 7.489               | 5519562                       | 118.872                                                            | 7.489               | 5409473                       | 0.980054758                         | 0.001236932                 |
| Y156N-H    | 121.361                         | 7.413               | 6100610                       | 121.355                                                            | 7.412               | 5861234                       | 0.960761957                         | 0.002668333                 |
| N158N-H    | 116.291                         | 8.604               | 4979134                       | 116.301                                                            | 8.605               | 4030174                       | 0.809412641                         | 0.004242641                 |
| Q159N-H    | 114.431                         | 7.272               | 8484909                       | 114.427                                                            | 7.273               | 8176128                       | 0.963608213                         | 0.00192873                  |
| V160N-H    | 112.65                          | 8.415               | 5226684                       | 112.644                                                            | 8.413               | 4792602                       | 0.916948872                         | 0.003181195                 |
| Y162N-H    | 111.092                         | 8.486               | 6066904                       | 111.105                                                            | 8.483               | 4460763                       | 0.73526184                          | 0.006142475                 |
| R163N-H    | 120.572                         | 7.922               | 3298904                       | 120.568                                                            | 7.923               | 2808503                       | 0.851344265                         | 0.00192873                  |
| Q171N-H    | 119.961                         | 8.627               | 1484388                       | 119.965                                                            | 8.621               | 963317                        | 0.648965769                         | 0.00622254                  |
| N172N-H    | 117.294                         | 8.371               | 6562358                       | 117.243                                                            | 8.368               | 5328290                       | 0.811947474                         | 0.021240763                 |
| N173N-H    | 118.206                         | 8.535               | 7794424                       | 118.151                                                            | 8.527               | 6385762                       | 0.819273111                         | 0.024046829                 |
| V175N-H    | 120.312                         | 8.836               | 1897252                       | 120.323                                                            | 8.825               | 1824789                       | 0.961806339                         | 0.011898319                 |
| H176N-H    | 117.324                         | 8.284               | 2150563                       | 117.307                                                            | 8.285               | 1858048                       | 0.863982129                         | 0.007080254                 |
| D177N-H    | 118.219                         | 7.428               | 2827622                       | 118.148                                                            | 7.417               | 2360777                       | 0.83489837                          | 0.031272512                 |
| C178N-H    | 119.002                         | 8.13                | 4817084                       | 118.954                                                            | 8.129               | 4618611                       | 0.958798103                         | 0.019816155                 |
| V179N-H    | 124.822                         | 9.233               | 5488668                       | 124.831                                                            | 9.246               | 4932554                       | 0.898679607                         | 0.013519246                 |
| N180N-H    | 116.361                         | 7.577               | 7626864                       | 116.357                                                            | 7.581               | 7075153                       | 0.927662143                         | 0.004326662                 |

|         |         |       |          |         |       |          |             |             |
|---------|---------|-------|----------|---------|-------|----------|-------------|-------------|
| I181N-H | 118.922 | 8.79  | 2502807  | 118.931 | 8.797 | 2632126  | 1.051669585 | 0.007922752 |
| T182N-H | 118.015 | 8.127 | 6209699  | 118.005 | 8.126 | 5780734  | 0.930920162 | 0.004242641 |
| I183N-H | 120.979 | 8.445 | 5048573  | 120.979 | 8.444 | 4326807  | 0.857035642 | 0.001       |
| K184N-H | 123.109 | 8.075 | 10107850 | 123.091 | 8.074 | 9565092  | 0.946303319 | 0.007488658 |
| Q185N-H | 117.084 | 8.508 | 6192122  | 117.092 | 8.51  | 5915419  | 0.955313703 | 0.00385746  |
| T187N-H | 114.775 | 8.482 | 4113032  | 114.788 | 8.487 | 3560518  | 0.865667469 | 0.007330075 |
| T189N-H | 115.193 | 8.149 | 8866311  | 115.187 | 8.151 | 8243462  | 0.929751054 | 0.003181195 |
| T190N-H | 114.527 | 8.016 | 7524849  | 114.52  | 8.016 | 6900086  | 0.916973351 | 0.002886174 |
| T191N-H | 118.116 | 8.232 | 8109748  | 118.12  | 8.232 | 6728460  | 0.829675595 | 0.001649242 |
| T192N-H | 116.268 | 7.787 | 5056456  | 116.264 | 7.785 | 3471103  | 0.686469535 | 0.002592296 |
| K193N-H | 120.027 | 7.843 | 19283854 | 120.023 | 7.843 | 16694135 | 0.86570532  | 0.001649242 |
| G194N-H | 107.838 | 7.892 | 8666257  | 107.816 | 7.889 | 7394852  | 0.853292488 | 0.009554057 |
| E195N-H | 119.861 | 7.507 | 7223036  | 119.86  | 7.506 | 6816574  | 0.943726987 | 0.001081665 |
| N196N-H | 119.463 | 8.503 | 11862763 | 119.448 | 8.503 | 10642914 | 0.897169909 | 0.006184658 |
| F197N-H | 121.7   | 8.712 | 9429347  | 121.697 | 8.714 | 9071685  | 0.962069272 | 0.002351595 |
| T198N-H | 115.876 | 9.563 | 4708860  | 115.861 | 9.564 | 4525244  | 0.961006273 | 0.006264982 |
| E199N-H | 119.993 | 9.155 | 5238926  | 119.989 | 9.157 | 4684064  | 0.894088598 | 0.002592296 |
| T200N-H | 116.519 | 7.92  | 6248851  | 116.519 | 7.918 | 5228702  | 0.836746147 | 0.002       |
| D201N-H | 120.189 | 7.433 | 9432615  | 120.186 | 7.431 | 8360230  | 0.886310954 | 0.002351595 |
| K203N-H | 119.101 | 7.678 | 7468032  | 119.089 | 7.677 | 7074695  | 0.947330568 | 0.005047772 |
| M204N-H | 118.401 | 8.147 | 7227908  | 118.382 | 8.147 | 6405634  | 0.886236239 | 0.007833901 |
| M205N-H | 118.175 | 8.677 | 6756188  | 118.169 | 8.676 | 6713302  | 0.993652338 | 0.002668333 |
| E206N-H | 118.881 | 8.549 | 7782566  | 118.889 | 8.551 | 7390547  | 0.949628567 | 0.00385746  |
| R207N-H | 116.724 | 7.253 | 7759989  | 116.702 | 7.252 | 7506032  | 0.967273536 | 0.009125788 |
| V208N-H | 119.035 | 8.22  | 6876130  | 119.015 | 8.219 | 6881002  | 1.000708538 | 0.008306624 |
| V209N-H | 121.199 | 9.124 | 4814300  | 121.203 | 9.126 | 4559622  | 0.947099682 | 0.002592296 |
| Q211N-H | 115.302 | 7.063 | 7254233  | 115.29  | 7.062 | 6477978  | 0.892992822 | 0.005047772 |
| C213N-H | 119.486 | 9.201 | 6035326  | 119.492 | 9.202 | 5288156  | 0.876200557 | 0.002668333 |
| V214N-H | 123.585 | 8.481 | 6191588  | 123.582 | 8.482 | 5234774  | 0.845465493 | 0.001590597 |
| T215N-H | 118.049 | 8.086 | 7364434  | 118.042 | 8.086 | 7191682  | 0.976542393 | 0.002886174 |
| Q216N-H | 122.552 | 8.674 | 4507784  | 122.556 | 8.673 | 4391530  | 0.974210388 | 0.00192873  |
| Y217N-H | 120.145 | 8.559 | 4821923  | 120.138 | 8.559 | 4509910  | 0.935292828 | 0.002886174 |
| Q218N-H | 119.663 | 8.214 | 11185052 | 119.661 | 8.213 | 11414723 | 1.020533745 | 0.001296148 |
| E220N-H | 118.239 | 8.376 | 5242058  | 118.244 | 8.378 | 5147454  | 0.981952889 | 0.002872281 |
| S221N-H | 115.038 | 8.343 | 3064523  | 115.044 | 8.342 | 2806842  | 0.91591481  | 0.002668333 |
| Q222N-H | 119.911 | 7.58  | 4464875  | 119.918 | 7.583 | 3623634  | 0.811586887 | 0.004162932 |
| A223N-H | 120.717 | 7.578 | 19668042 | 120.711 | 7.579 | 18515702 | 0.941410538 | 0.002668333 |
| Y224N-H | 118.863 | 7.89  | 24954530 | 118.855 | 7.892 | 22608668 | 0.905994543 | 0.00385746  |
| D226N-H | 121.005 | 8.181 | 19005454 | 120.994 | 8.181 | 15290480 | 0.804531162 | 0.004535416 |
| G227N-H | 108.015 | 7.826 | 17143192 | 108.012 | 7.827 | 15098134 | 0.88070728  | 0.001590597 |
| R229N-H | 122.468 | 8.218 | 15411889 | 122.467 | 8.217 | 10924686 | 0.708847955 | 0.001081665 |
| S230N-H | 122.686 | 7.953 | 56243100 | 122.676 | 7.953 | 56165860 | 0.998626676 | 0.004123106 |

**Table S2.** NMR data extracted from WT PrP<sup>C</sup> sample and WT PrP<sup>C</sup> and D-A $\beta$ (1-30). Data includes the  $\omega_N$  (ppm),  $\omega_{HN}$  (ppm), and peak height for each assigned residue from each spectrum collected. Intensity ratio's (I/I<sub>0</sub>) and weighted average chemical shifts ( $\Delta$ ) were calculated as described in the material and methods.

| Assignment | 100 $\mu$ M WT PrP <sup>C</sup> |                     |                               | 100 $\mu$ M WT PrP <sup>C</sup> and 200 $\mu$ M L-A $\beta$ (1-30) |                     |                               | Results                             |                             |
|------------|---------------------------------|---------------------|-------------------------------|--------------------------------------------------------------------|---------------------|-------------------------------|-------------------------------------|-----------------------------|
|            | $\omega_N$ (ppm)                | $\omega_{HN}$ (ppm) | Peak Height (I <sub>0</sub> ) | $\omega_N$ (ppm)                                                   | $\omega_{HN}$ (ppm) | Peak Height (I <sub>0</sub> ) | Intensity Ratio (I/I <sub>0</sub> ) | Chemical Shift ( $\Delta$ ) |
| T94N-H     | 113.352                         | 7.986               | 7599211                       | 113.353                                                            | 7.987               | 9010806                       | 1.185755469                         | 0.001081665                 |
| K100N-H    | 122.407                         | 7.957               | 18201508                      | 122.443                                                            | 7.962               | 19434664                      | 1.067750211                         | 0.015662695                 |
| S102N-H    | 116.749                         | 8.391               | 4961444                       | 116.77                                                             | 8.393               | 6767177                       | 1.363953115                         | 0.008886507                 |
| K103N-H    | 124.062                         | 8.288               | 7353367                       | 124.073                                                            | 8.29                | 9226588                       | 1.254743303                         | 0.004956813                 |
| K105N-H    | 122.001                         | 8.507               | 12545061                      | 122.005                                                            | 8.507               | 14251673                      | 1.136038557                         | 0.001649242                 |
| L108N-H    | 123.122                         | 8.265               | 28239366                      | 123.135                                                            | 8.267               | 28681440                      | 1.01565453                          | 0.005721014                 |
| K109N-H    | 121.681                         | 8.255               | 15919620                      | 121.681                                                            | 8.255               | 16863918                      | 1.059316617                         | 0                           |
| A112N-H    | 128.014                         | 8.402               | 27872390                      | 128.032                                                            | 8.406               | 27081234                      | 0.971615064                         | 0.008430896                 |
| A114N-H    | 123.844                         | 8.114               | 21248888                      | 123.851                                                            | 8.116               | 23128564                      | 1.08845997                          | 0.00351141                  |
| A115N-H    | 123.213                         | 8.204               | 33714788                      | 123.226                                                            | 8.205               | 33952244                      | 1.007043082                         | 0.005452522                 |
| A116N-H    | 123.356                         | 8.11                | 7722185                       | 123.35                                                             | 8.109               | 7288922                       | 0.94389373                          | 0.002668333                 |
| A117N-H    | 123.248                         | 8.172               | 55127228                      | 123.259                                                            | 8.173               | 54284956                      | 0.984721307                         | 0.004644351                 |
| G118N-H    | 107.872                         | 8.256               | 18917360                      | 107.88                                                             | 8.257               | 20443480                      | 1.08067299                          | 0.003446738                 |
| A119N-H    | 123.541                         | 8.049               | 27529366                      | 123.545                                                            | 8.05                | 27166442                      | 0.986816841                         | 0.00192873                  |
| V120N-H    | 119.53                          | 8.103               | 42597488                      | 119.539                                                            | 8.104               | 44074188                      | 1.034666363                         | 0.003843176                 |
| V121N-H    | 124.543                         | 8.247               | 29381036                      | 124.551                                                            | 8.248               | 26526814                      | 0.902854957                         | 0.003446738                 |
| G122N-H    | 113.267                         | 8.531               | 14296060                      | 113.272                                                            | 8.533               | 15532709                      | 1.086502785                         | 0.002872281                 |
| L124N-H    | 121.712                         | 8.172               | 13385230                      | 121.715                                                            | 8.172               | 14450449                      | 1.079581673                         | 0.001236932                 |
| Y127N-H    | 117.984                         | 7.82                | 9945982                       | 117.984                                                            | 7.818               | 9790498                       | 0.984367154                         | 0.002                       |
| M128N-H    | 121.441                         | 9.09                | 2881365                       | 121.441                                                            | 9.091               | 3007414                       | 1.04374628                          | 0.001                       |
| G130N-H    | 114.972                         | 9.365               | 1117235                       | 114.987                                                            | 9.371               | 973903                        | 0.87170828                          | 0.008616844                 |
| S131N-H    | 113.771                         | 8.276               | 10893098                      | 113.766                                                            | 8.276               | 11363523                      | 1.043185602                         | 0.002061553                 |
| A132N-H    | 125.548                         | 8.688               | 8619931                       | 125.539                                                            | 8.689               | 8563679                       | 0.993474194                         | 0.003843176                 |
| M133N-H    | 121.301                         | 8.752               | 5308498                       | 121.309                                                            | 8.754               | 5647340                       | 1.063830108                         | 0.00385746                  |
| S134N-H    | 116.183                         | 8.398               | 7135180                       | 116.183                                                            | 8.398               | 7652020                       | 1.072435454                         | 0                           |
| R135N-H    | 126.602                         | 8.621               | 7081700                       | 126.606                                                            | 8.622               | 7040720                       | 0.994213254                         | 0.00192873                  |
| M137N-H    | 122.022                         | 8.67                | 5193312                       | 122.048                                                            | 8.674               | 5452964                       | 1.049997381                         | 0.011442028                 |
| I138N-H    | 124.302                         | 6.57                | 9883306                       | 124.307                                                            | 6.57                | 10123269                      | 1.024279629                         | 0.002061553                 |
| F140N-H    | 125.12                          | 10.315              | 4479014                       | 125.109                                                            | 10.31               | 4775168                       | 1.066120356                         | 0.006750556                 |
| G141N-H    | 108.965                         | 8.915               | 4440792                       | 108.946                                                            | 8.925               | 4743104                       | 1.068076145                         | 0.012703149                 |
| N142N-H    | 114.331                         | 7.239               | 13397423                      | 114.316                                                            | 7.241               | 14091570                      | 1.051811979                         | 0.0065                      |
| D143N-H    | 123.182                         | 8.975               | 3279674                       | 123.165                                                            | 8.977               | 4083602                       | 1.245124363                         | 0.007289033                 |
| W144N-H    | 120.353                         | 8.493               | 9968630                       | 120.378                                                            | 8.493               | 9546909                       | 0.95769519                          | 0.010307764                 |
| Y148N-H    | 120.875                         | 8.248               | 7633424                       | 120.901                                                            | 8.252               | 8254200                       | 1.081323401                         | 0.011442028                 |
| Y149N-H    | 120.468                         | 8.984               | 5219158                       | 120.459                                                            | 8.982               | 5610992                       | 1.075076095                         | 0.004215448                 |
| R150N-H    | 117.344                         | 7.87                | 7145774                       | 117.352                                                            | 7.872               | 6975852                       | 0.976220631                         | 0.00385746                  |
| E151N-H    | 115.792                         | 7.889               | 7511505                       | 115.788                                                            | 7.89                | 7602953                       | 1.012174391                         | 0.00192873                  |
| N152N-H    | 115.174                         | 7.53                | 6912278                       | 115.181                                                            | 7.531               | 7393772                       | 1.069657789                         | 0.003054505                 |
| M153N-H    | 118.381                         | 7.848               | 6395594                       | 118.378                                                            | 7.847               | 6378846                       | 0.997381322                         | 0.001590597                 |
| Y154N-H    | 116.561                         | 7.552               | 7140714                       | 116.568                                                            | 7.553               | 7532937                       | 1.054927701                         | 0.003054505                 |
| R155N-H    | 118.87                          | 7.49                | 5943372                       | 118.863                                                            | 7.491               | 6064672                       | 1.02040929                          | 0.003054505                 |
| Y156N-H    | 121.343                         | 7.415               | 7744109                       | 121.337                                                            | 7.415               | 8045284                       | 1.038890852                         | 0.002473863                 |
| N158N-H    | 116.27                          | 8.601               | 5806276                       | 116.266                                                            | 8.6                 | 5917625                       | 1.019177352                         | 0.00192873                  |
| Q159N-H    | 114.417                         | 7.273               | 10073591                      | 114.416                                                            | 7.273               | 9969974                       | 0.989713996                         | 0.000412311                 |
| V160N-H    | 112.648                         | 8.418               | 5705808                       | 112.649                                                            | 8.419               | 5389332                       | 0.944534411                         | 0.001081665                 |
| Y162N-H    | 111.084                         | 8.486               | 7230830                       | 111.08                                                             | 8.488               | 7079639                       | 0.979090782                         | 0.002592296                 |
| R163N-H    | 120.584                         | 7.925               | 2765741                       | 120.611                                                            | 7.922               | 2630220                       | 0.951000112                         | 0.011529527                 |
| Q171N-H    | 120.011                         | 8.625               | 1412379                       | 120.021                                                            | 8.628               | 1573185                       | 1.113854709                         | 0.00509902                  |
| N172N-H    | 117.284                         | 8.372               | 7607164                       | 117.252                                                            | 8.375               | 7878228                       | 1.035632727                         | 0.013530706                 |
| N173N-H    | 118.251                         | 8.54                | 8278934                       | 118.281                                                            | 8.545               | 7451961                       | 0.900111174                         | 0.013341664                 |
| V175N-H    | 120.3                           | 8.851               | 1640570                       | 120.294                                                            | 8.86                | 1430491                       | 0.871947555                         | 0.00933381                  |
| H176N-H    | 117.303                         | 8.289               | 1705571                       | 117.315                                                            | 8.291               | 1692911                       | 0.992577266                         | 0.005336666                 |
| D177N-H    | 118.253                         | 7.435               | 2497870                       | 118.291                                                            | 7.444               | 2410560                       | 0.965046219                         | 0.018068758                 |
| C178N-H    | 119.006                         | 8.128               | 4915970                       | 119.03                                                             | 8.129               | 4706814                       | 0.957453768                         | 0.009945853                 |
| V179N-H    | 124.811                         | 9.228               | 5979134                       | 124.801                                                            | 9.22                | 5884665                       | 0.98420022                          | 0.009                       |
| N180N-H    | 116.357                         | 7.575               | 8160881                       | 116.359                                                            | 7.572               | 8376263                       | 1.026392004                         | 0.00311127                  |

|         |         |       |          |         |       |          |             |             |
|---------|---------|-------|----------|---------|-------|----------|-------------|-------------|
| I181N-H | 118.923 | 8.79  | 2078953  | 118.928 | 8.787 | 2055541  | 0.988738562 | 0.003640055 |
| T182N-H | 117.999 | 8.127 | 6527006  | 118     | 8.128 | 6365856  | 0.975310272 | 0.001081665 |
| I183N-H | 120.955 | 8.447 | 5263040  | 120.97  | 8.447 | 5661556  | 1.075719736 | 0.006184658 |
| K184N-H | 123.11  | 8.072 | 7889451  | 123.105 | 8.072 | 7735666  | 0.980507516 | 0.002061553 |
| Q185N-H | 117.075 | 8.505 | 6828934  | 117.064 | 8.503 | 6747572  | 0.988085695 | 0.004956813 |
| T187N-H | 114.77  | 8.479 | 4713188  | 114.77  | 8.477 | 4410362  | 0.935749221 | 0.002       |
| T189N-H | 115.185 | 8.149 | 10348718 | 115.189 | 8.148 | 10071270 | 0.973190109 | 0.00192873  |
| T190N-H | 114.523 | 8.015 | 7628314  | 114.534 | 8.015 | 7811226  | 1.023978038 | 0.004535416 |
| T191N-H | 118.099 | 8.235 | 8964452  | 118.076 | 8.235 | 9083653  | 1.013297076 | 0.009483143 |
| T192N-H | 116.263 | 7.79  | 5647434  | 116.265 | 7.791 | 6644770  | 1.17659985  | 0.001296148 |
| K193N-H | 120.019 | 7.846 | 19206682 | 120.02  | 7.845 | 18371274 | 0.956504304 | 0.001081665 |
| G194N-H | 107.845 | 7.896 | 7783320  | 107.86  | 7.899 | 8419995  | 1.081799926 | 0.006873864 |
| E195N-H | 119.867 | 7.507 | 8017998  | 119.867 | 7.508 | 8144990  | 1.015838368 | 0.001       |
| N196N-H | 119.458 | 8.502 | 14097840 | 119.464 | 8.502 | 14106116 | 1.00058704  | 0.002473863 |
| F197N-H | 121.696 | 8.713 | 9995051  | 121.698 | 8.712 | 9846834  | 0.985170961 | 0.001296148 |
| T198N-H | 115.884 | 9.564 | 4842063  | 115.902 | 9.564 | 4576374  | 0.945128967 | 0.00742159  |
| E199N-H | 119.999 | 9.157 | 5809536  | 119.98  | 9.156 | 5965154  | 1.026786649 | 0.007897468 |
| T200N-H | 116.512 | 7.923 | 6385032  | 116.519 | 7.923 | 6858965  | 1.074225626 | 0.002886174 |
| D201N-H | 120.198 | 7.438 | 10432314 | 120.236 | 7.443 | 10702344 | 1.025883999 | 0.016446276 |
| K203N-H | 119.105 | 7.679 | 7832155  | 119.11  | 7.68  | 7991847  | 1.02038928  | 0.002291288 |
| M204N-H | 118.395 | 8.148 | 7529192  | 118.406 | 8.149 | 7764990  | 1.031317836 | 0.004644351 |
| M205N-H | 118.174 | 8.68  | 6901240  | 118.179 | 8.681 | 7195948  | 1.04270363  | 0.002291288 |
| E206N-H | 118.871 | 8.546 | 7588830  | 118.862 | 8.544 | 8030802  | 1.058239808 | 0.004215448 |
| R207N-H | 116.733 | 7.254 | 8124218  | 116.743 | 7.255 | 8199380  | 1.009251598 | 0.004242641 |
| V208N-H | 119.013 | 8.224 | 7428010  | 119.006 | 8.224 | 7740686  | 1.042094181 | 0.002886174 |
| V209N-H | 121.195 | 9.123 | 5245350  | 121.193 | 9.123 | 5534516  | 1.055128066 | 0.000824621 |
| Q211N-H | 115.304 | 7.066 | 7135840  | 115.31  | 7.067 | 7321592  | 1.026030853 | 0.002668333 |
| C213N-H | 119.478 | 9.204 | 6810310  | 119.469 | 9.204 | 6720913  | 0.986873285 | 0.003710795 |
| V214N-H | 123.589 | 8.478 | 6784410  | 123.598 | 8.477 | 6675074  | 0.983884229 | 0.003843176 |
| T215N-H | 118.058 | 8.083 | 7947930  | 118.051 | 8.083 | 7953478  | 1.000698043 | 0.002886174 |
| Q216N-H | 122.541 | 8.676 | 4918546  | 122.539 | 8.677 | 4898336  | 0.995891062 | 0.001296148 |
| Y217N-H | 120.126 | 8.557 | 5298240  | 120.127 | 8.558 | 4969368  | 0.937928067 | 0.001081665 |
| Q218N-H | 119.665 | 8.218 | 10376212 | 119.662 | 8.219 | 10254456 | 0.988265853 | 0.001590597 |
| E220N-H | 118.222 | 8.38  | 5284200  | 118.219 | 8.378 | 5326260  | 1.007959578 | 0.002351595 |
| S221N-H | 115.028 | 8.345 | 2681182  | 115.025 | 8.346 | 2405050  | 0.897011094 | 0.001590597 |
| Q222N-H | 119.887 | 7.58  | 5162835  | 119.88  | 7.577 | 4922432  | 0.953435855 | 0.004162932 |
| A223N-H | 120.71  | 7.578 | 20943726 | 120.712 | 7.578 | 20585298 | 0.98288614  | 0.000824621 |
| Y224N-H | 118.862 | 7.892 | 22790502 | 118.864 | 7.892 | 20519744 | 0.900363845 | 0.000824621 |
| D226N-H | 121.007 | 8.181 | 19559656 | 121.023 | 8.181 | 19300792 | 0.986765411 | 0.006596969 |
| G227N-H | 108.012 | 7.829 | 17316842 | 108.01  | 7.829 | 17630138 | 1.018091982 | 0.000824621 |
| R229N-H | 122.466 | 8.22  | 19734834 | 122.463 | 8.22  | 21075528 | 1.067935408 | 0.001236932 |
| S230N-H | 122.679 | 7.953 | 56587056 | 122.681 | 7.953 | 52432520 | 0.926581514 | 0.000824621 |
